# Supplementary material
Source: publisher site journal article supplement (https://www.dovepress.com/article/496827)
Supplement: Supplementary file 1 [file get_supplementary_file.php]

**Supplemental Information**

**Injectable self-assembling procyanidin nanospheres for effective osteoarthritis treatment**

Guangjie Li1,2,#, Fei He2,#, Jianbao Feng3, Ge Xu1, Chengye Wu1, Yufei Qiao1, Yang Liu3, Hanlin Chen1, Pengcheng Du4, Jizeng Wang2,*

1The First Hospital of Lanzhou University, Lanzhou, 730030, China.

2College of Civil Engineering and Mechanics, Lanzhou University, Lanzhou, 730000, China.

3Hospital of Stomatology, Lanzhou University, Lanzhou, 730000, China.

4College of chemistry and chemical engineering, Lanzhou University, 730000, China.

*Correspondence: Jizeng Wang Email: [jzwang@lzu.edu.cn](mailto:jzwang@lzu.edu.cn)

**Materials and methods**

**MRI**

After Rats were anesthetized with 10% chloral hydrate, the MRI scans of the knee joint was performed by a 3.0 Tesla magnetic resonance scanner and 16-channel knee coil, and the scan were acquired using a T2-weighted magnetic resonance imaging (TR= TR=2700ms, TE=120ms, image matrix 256×256, thickness 2.0mm, 11 slices).

**Histological**

After MRI the rats were immediately euthanized. The knee joints were removed and fixed in the 4% paraformaldehyde (Solarbio, Beijing, China) for 24 h at room temperature. Decalcification was performed using 10% nitric acid (Beijing Chemical Works, Beijing, China) for 24 h. The decalcified joints were dehydrated using gradient alcohol (70%-100%), embedded in paraffin and cut into 5 µm thick sections. The slides were baked at 60 ℃ until completely dried. The sections were stained with hematoxylin for 30 min and eosin for 5 s, visualization was performed by using a microscope (BX53, Olympus, Japan) after the sections were sealed with neutral balsam (Solarbio, Beijing, China).


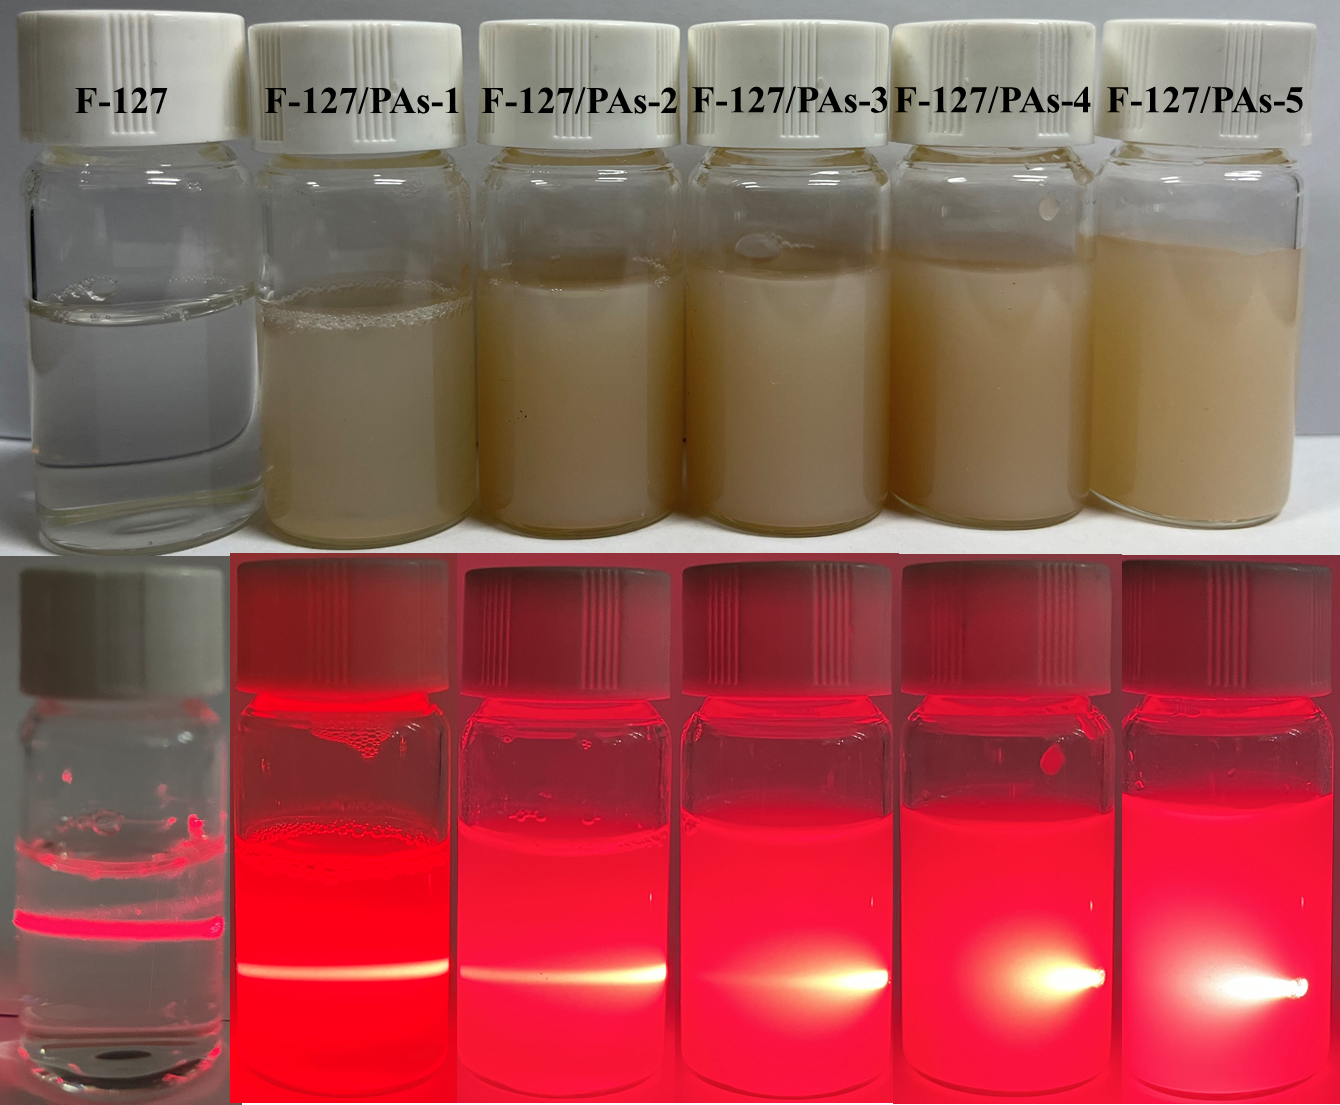


**Fig. S1**. Phots of Picture of PF127, PA-1/PF127, PA-2/PF127, PA-3/PF127, PA-4/PF127, and PA-5/PF127 and their Tyndall effect.


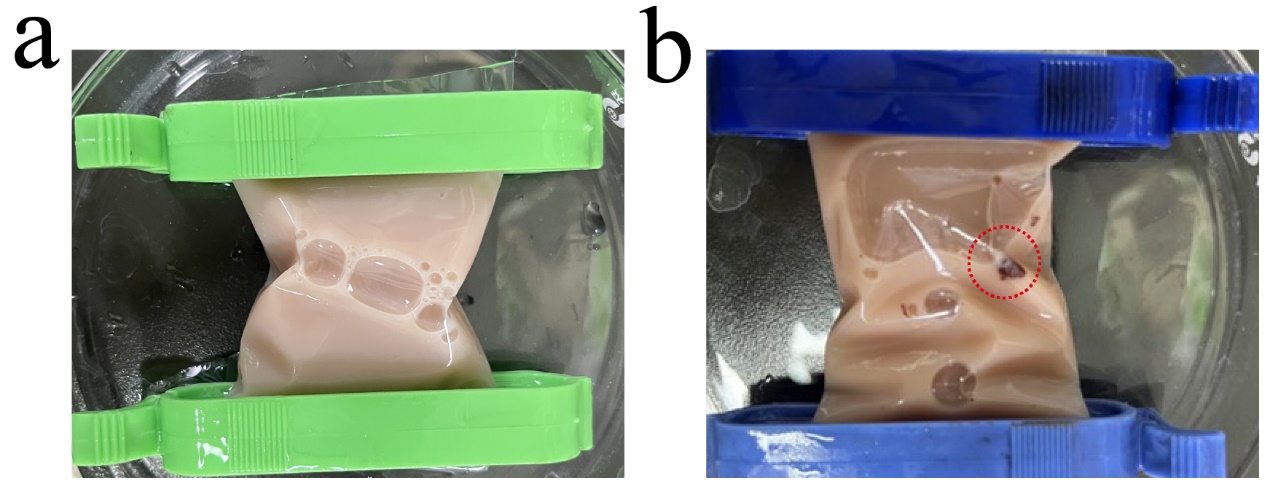


**Fig. S2**. The dispersibility of PAs-4/PF127 (a) and PAs-5/PF127 (b). The PAs-5/PF127 had agglomerated (Red dotted line).


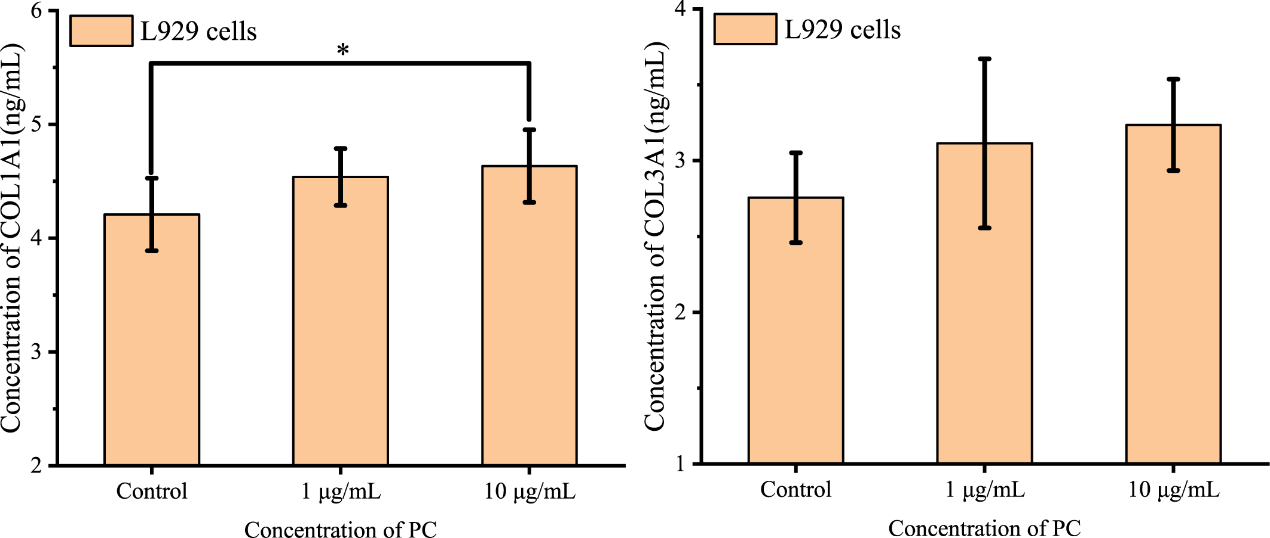


**Fig. S3**. COL1A1 and COL3A1 expression of L929 fibroblast after 14 days’ co-culture with procyanidins. *p < 0.05.

**Table S1** P-valve of Figure 3A

|  | Vehicle | 5% PAs/PF127 | 10% PAs/PF127 | 20% PAs/PF127 |
| --- | --- | --- | --- | --- |
| Vehicle | **—** | 0.049 | ＜0.001 | ＜0.001 |
| 5% PAs/PF127 | 0.049 | **—** | 0.541 | ＜0.001 |
| 10% PAs/PF127 | ＜0.001 | 0.541 | **—** | ＜0.001 |
| 20% PAs/PF127 | ＜0.001 | ＜0.001 | ＜0.001 | **—** |

**Table S2** P-valve of Figure 3A box

|  | 10% PAs/PF127 | PF127 | PAs |
| --- | --- | --- | --- |
| 10% PAs/PF127 | **—** | 0.314 | ＜0.001 |
| PF127 | 0.314 | **—** | ＜0.001 |
| PAs | ＜0.001 | ＜0.001 | **—** |

**Table S3** P-valve of Figure 3B

|  | Vehicle | 5% PAs/PF127 | 10% PAs/PF127 | 20% PAs/PF127 |
| --- | --- | --- | --- | --- |
| Vehicle | **—** | ＜0.001 | ＜0.001 | ＜0.001 |
| 5% PAs/PF127 | ＜0.001 | **—** | 1 | ＜0.001 |
| 10% PAs/PF127 | ＜0.001 | 1 | **—** | ＜0.001 |
| 20% PAs/PF127 | ＜0.001 | ＜0.001 | ＜0.001 | **—** |

**Table S4** P-valve of Figure 3B box

|  | 10% PAs/PF127 | PF127 | PAs |
| --- | --- | --- | --- |
| 10% PAs/PF127 | **—** | 0.002 | ＜0.001 |
| PF127 | 0.002 | **—** | ＜0.001 |
| PAs | ＜0.001 | ＜0.001 | **—** |

**Table S5** P-valve of Figure 4Aa (COL1A1)

|  | Vehicle | 5% PAs/PF127 | 10% PAs/PF127 | 20% PAs/PF127 |
| --- | --- | --- | --- | --- |
| Vehicle | **—** | 0.003 | ＜0.001 | ＜0.001 |
| 5% PAs/PF127 | 0.003 | **—** | 0.002 | ＜0.001 |
| 10% PAs/PF127 | ＜0.001 | 0.002 | **—** | ＜0.001 |
| 20% PAs/PF127 | ＜0.001 | ＜0.001 | ＜0.001 | **—** |

**Table S6** P-valve of Figure 4Aa box (COL1A1)

|  | 10% PAs/PF127 | PF127 | PAs |
| --- | --- | --- | --- |
| 10% PAs/PF127 | **—** | ＜0.001 | 0.001 |
| PF127 | ＜0.001 | **—** | ＜0.001 |
| PAs | 0.001 | ＜0.001 | **—** |

**Table S7** P-valve of Figure 4Ab (COL3A1)

|  | Vehicle | 5% PAs/PF127 | 10% PAs/PF127 | 20% PAs/PF127 |
| --- | --- | --- | --- | --- |
| Vehicle | **—** | ＜0.001 | ＜0.001 | ＜0.001 |
| 5% PAs/PF127 | ＜0.001 | **—** | 0.002 | ＜0.001 |
| 10% PAs/PF127 | ＜0.001 | ＜0.001 | **—** | ＜0.001 |
| 20% PAs/PF127 | ＜0.001 | ＜0.001 | ＜0.001 | **—** |

**Table S8** P-valve of Figure 4Ab box (COL3A1)

|  | 10% PAs/PF127 | PF127 | PAs |
| --- | --- | --- | --- |
| 10% PAs/PF127 | **—** | ＜0.001 | 0.03 |
| PF127 | ＜0.001 | **—** | ＜0.001 |
| PAs | 0.03 | ＜0.001 | **—** |

**Table S9** P-valve of Figure 4Bb

|  | Vehicle | PAs | PF127 | 5% PAs/PF127 | 10% PAs/PF127 | 20% PAs/PF127 |
| --- | --- | --- | --- | --- | --- | --- |
| Vehicle | **—** | ＜0.001 | ＜0.001 | ＜0.001 | ＜0.001 | ＜0.001 |
| PAs | ＜0.001 | **—** | ＜0.001 | ＜0.001 | ＜0.001 | ＜0.001 |
| PF127 | ＜0.001 | ＜0.001 | **—** | ＜0.001 | ＜0.001 | ＜0.001 |
| 5% PAs/PF127 | ＜0.001 | ＜0.001 | ＜0.001 | **—** | ＜0.001 | ＜0.001 |
| 10% PAs/PF127 | ＜0.001 | ＜0.001 | ＜0.001 | ＜0.001 | **—** | ＜0.001 |
| 20% PAs/PF127 | ＜0.001 | ＜0.001 | ＜0.001 | ＜0.001 | ＜0.001 | **—** |

**Table S10** P-valve of Figure 4Bc (COL2A1)

|  | Vehicle | 5% PAs/PF127 | 10% PAs/PF127 | 20% PAs/PF127 |
| --- | --- | --- | --- | --- |
| Vehicle | **—** | 1 | 0.122 | 0.285 |
| 5% PAs/PF127 | 1 | **—** | 0.032 | 0.072 |
| 10% PAs/PF127 | 0.122 | 0.032 | **—** | 1 |
| 20% PAs/PF127 | 0.285 | 0.072 | 1 | **—** |

**Table S11** P-valve of Figure 4Bc box (COL2A1)

|  | 10% PAs/PF127 | PF127 | PAs |
| --- | --- | --- | --- |
| 10% PAs/PF127 | **—** | 0.038 | 0.007 |
| PF127 | 0.038 | **—** | 0.524 |
| PAs | 0.007 | 0.524 | **—** |

**Table S12** P-valve of Figure S3 (COL1A1)

|  | Control | 1 μg/mL PAs | 10 μg/mL PAs |
| --- | --- | --- | --- |
| Control | **—** | 0.454 | 0.22 |
| 1 μg/mL PAs | 0.454 | **—** | 1 |
| 10 μg/mL PAs | 0.22 | 1 | **—** |

**Table S13** P-valve of Figure S3 (COL3A1)

|  | Control | 1 μg/mL PAs | 10 μg/mL PAs |
| --- | --- | --- | --- |
| Control | **—** | 0.724 | 0.382 |
| 1 μg/mL PAs | 0.724 | **—** | 1 |
| 10 μg/mL PAs | 0.382 | 1 | **—** |
